# Supplementary material for: In situ growth of gold nanoparticles on magnetic γ-Fe2O3@cellulose nanocomposites: a highly active and recyclable catalyst for reduction of 4-nitrophenol
Source: Royal Society of Chemistry journal article supplement (doi:10.1039/c3ra46761a), 2013-12-24
Supplement: c3ra46761a.pdf [file c3ra46761a.pdf]

## Supplementary information

### ***In situ* growth of gold nanoparticles on magnetic $\gamma$ -Fe<sub>2</sub>O<sub>3</sub>@cellulose nanocomposites: a highly active and recyclable catalyst for reduction of 4-nitrophenol**

Rui Xiong, Yaru Wang, Xinxing Zhang\*, Canhui Lu\* and Lidan Lan

State Key Laboratory of Polymer Materials Engineering, Polymer Research Institute of Sichuan University, Chengdu 610065, China

Corresponding author: Xinxing Zhang and Canhui Lu

E-mail address: xxzwwh@scu.edu.cn, canhuilu@scu.edu.cn;

Tel: +86-28-85460607; Fax: +86-28-85402465

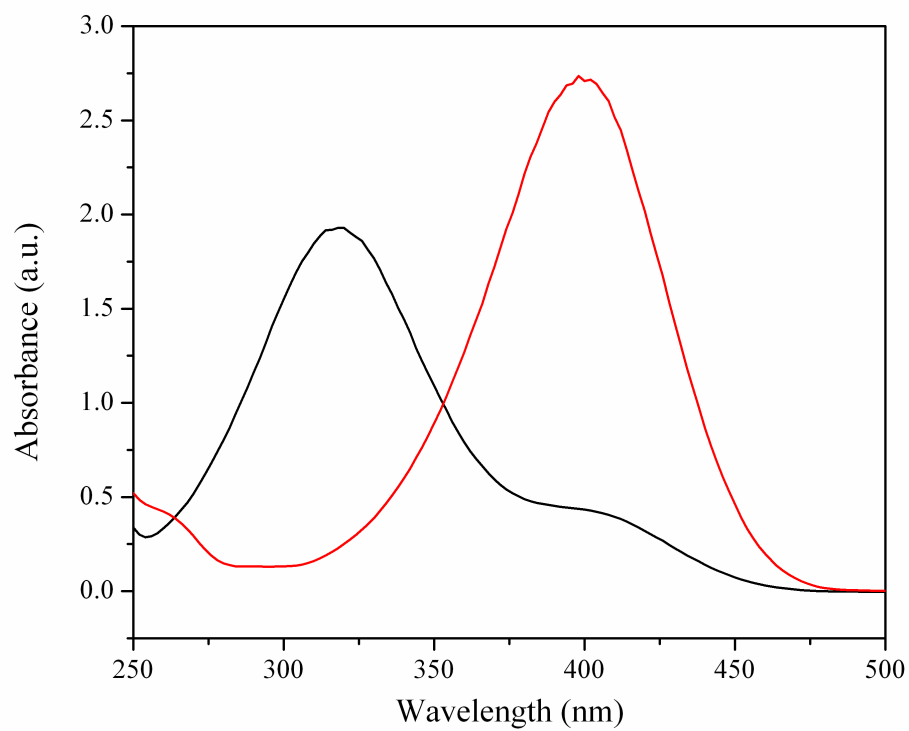

**Fig. 1** UV-vis absorption spectra of 4-NP without (black line) and with (red line) the presence of NaBH<sub>4</sub>.

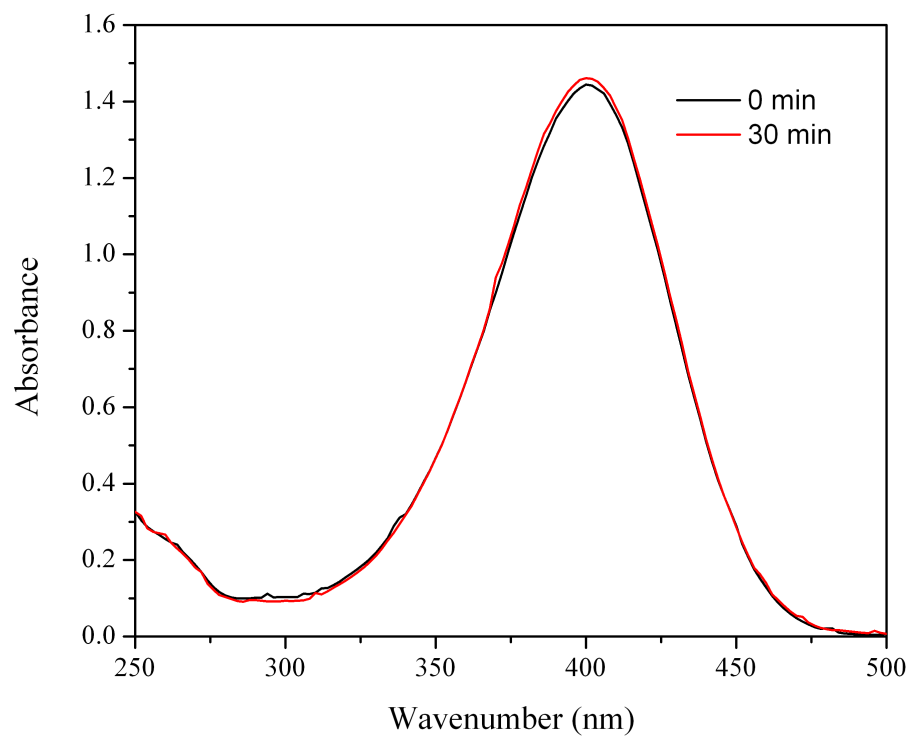

**Fig. 2** UV-vis absorption spectra taken after adding NaBH<sub>4</sub> into 4-NP solution.

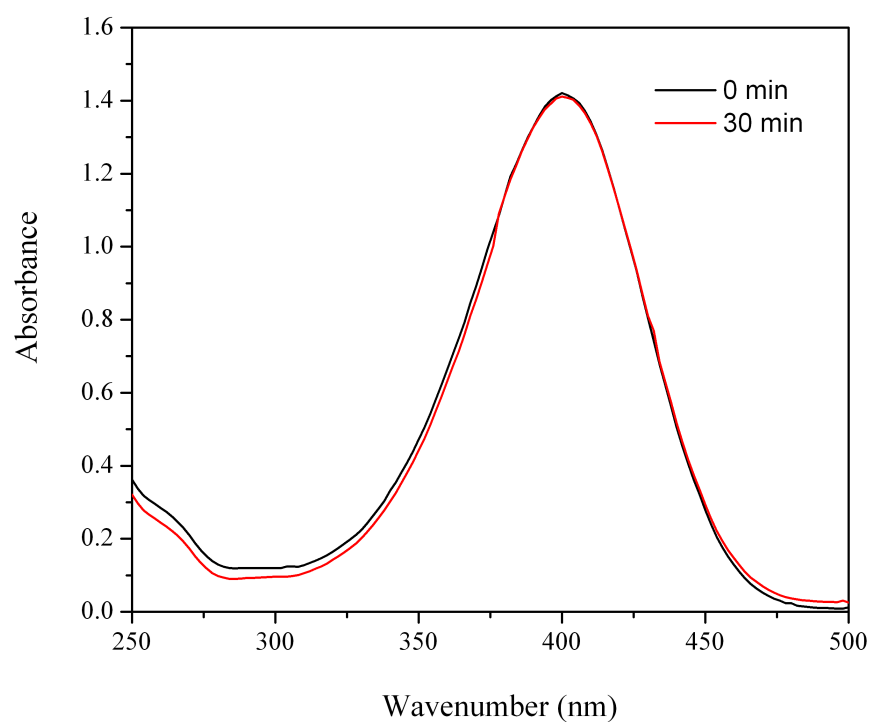

**Fig. 3** UV-vis absorption spectra taken after adding NaBH<sub>4</sub> into 4-NP solution in the presence of ICC MNPs.
